# Supplementary material
Source: ML conference proceedings conference paper supplement (https://openaccess.thecvf.com/content/CVPR2026/html/Li_Sparse-LaViDa_Sparse_Multimodal_CVPR_2026_paper.html)
Supplement: Supplementary file 1 [file Li_Sparse-LaViDa_Sparse_Multimodal_CVPR_2026_supplemental.pdf]

# Sparse-LaViDa: Sparse Multimodal Discrete Diffusion Language Models

## Supplementary Material

### 7. Additional Technical Details

#### 7.1. Formulation of Discrete Diffusion Models

In this section, we include an overview of the standard formulation of Masked Diffusion Models (MDMs) that are widely adopted by literature [32, 33, 38, 51, 69].

Given a sequence  $X_0$  consisting of discrete tokens  $[X_0^1, X_0^2, \dots, X_0^L]$ , where  $L$  is the sequence length, the forward process  $q(X_t|X_s)$  gradually mask the sequence and convert clean tokens to a special mask token  $[M]$  over the continuous time interval  $[0, 1]$ , with  $1 \geq t \geq s \geq 0$ . At  $t = 1$ , the sequence  $X_1 = [X_1^1, X_1^2, \dots, X_1^L]$  consists of only masked token. This forward process is formally defined as

$$q(X_t^i|X_s^i) = \begin{cases} \text{Cat}(X_t^i; \mathbf{M}), & \text{if } X_s^i = [M] \\ \text{Cat}(X_t^i; \frac{1-t}{1-s}\mathbf{X}_s^i + \frac{t-s}{1-s}\mathbf{M}), & \text{if } X_s^i \neq [M], \end{cases} \quad (2)$$

where  $\text{Cat}(\cdot)$  denotes a categorical distribution, and  $\mathbf{M}, \mathbf{X}_0^i, \mathbf{X}_s^i \in \mathbb{R}^{|V|}$  are probability vectors, and  $|V|$  is the vocabulary size. In particular,  $\mathbf{M}$  is a one-hot vector corresponding to the special token  $[M]$ . This forward process yields the following marginal distribution:

$$q(X_t^i|X_0^i) = \text{Cat}(X_t^i; (1-t)\mathbf{X}_0^i + t\mathbf{M}). \quad (3)$$

Prior works [51] show that the posterior of the reverse process  $p(X_s|X_t, X_0)$  has the following form:

$$p(X_s^i|X_t^i, X_0^i) = \begin{cases} \text{Cat}(X_s^i; \mathbf{X}_t^i), & \text{if } X_s^i \neq [M] \\ \text{Cat}(X_s^i; \frac{t-s}{t}\mathbf{X}_0^i + \frac{s}{t}\mathbf{M}), & \text{if } X_s^i = [M]. \end{cases} \quad (4)$$

At inference,  $\mathbf{X}_0$  is not known, so we replace  $\mathbf{X}_0^i$  with the neural network prediction  $p_\theta(X_0^i|X_t)$ , which gives the following empirical sampling process:

$$p_\theta(X_s^i|X_t) = \begin{cases} \text{Cat}(X_s^i; \mathbf{X}_t^i), & \text{if } X_s^i \neq [M] \\ \text{Cat}(X_s^i; \frac{t-s}{t}p_\theta(X_0^i|X_t) + \frac{s}{t}\mathbf{M}), & \text{if } X_s^i = [M]. \end{cases} \quad (5)$$

**Sampling process.** To sample a sequence of clean tokens  $X_0$ , we start with a fully masked sequence  $X_1$ , where  $X_1^1 = \dots = X_1^L = [M]$ . We discretize the continuous time interval  $[0, 1]$  into discrete timesteps  $0 = t_0 < t_1 < \dots < t_K = 1$ , and iteratively sample  $X_{t_{k-1}} \sim p_\theta(X_{t_{k-1}}|X_{t_k})$  using Equation 5. We start with  $k = K$  and end when we obtain a mask-free sequence  $X_0$ . At each step, we assume  $p_\theta(X_{t_{k-1}}|X_{t_k})$  factorizes as  $\prod_{i=1}^L p_\theta(X_{t_{k-1}}^i|X_{t_k})$ , following previous works [38, 45, 51].

**Training process.** At each training step, given a clean sequence  $X_0$ , we sample a random timestep  $t \in [0, 1]$  and obtain  $X_t \sim q(X_t|X_0)$  through the forward process defined in Equation 3. This gives us a partially masked sequence. The loss is then computed using Equation 1 from Section 2.1.

We highlight that Sparse-LaViDa does not fundamentally change these formulations. Rather, it proposes an equivalent but efficient parameterization by introducing a sparse representation for the partially masked sequence  $X_t$ .

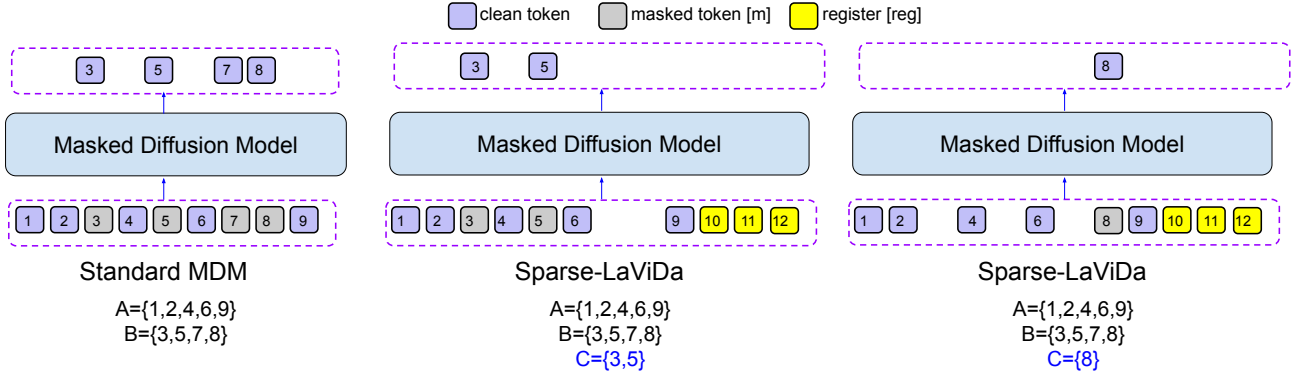

Figure 7. **Sparse-Representation of Partially Masked Sequence.** Given a partially masked sequence, we can partition its tokens into two subsets  $A$  and  $B$ , where  $A$  consists of clean tokens and  $B$  consists of masked tokens. The standard MDM (Left) need to pass all  $|A| + |B|$  tokens. By contrast, Sparse-LaViDa (Middle and Right) only need to pass  $|A| + |C| + m$  tokens, where  $C$  is a subset of  $B$  and  $m$  is the number of register tokens (set to 3) in this case.

## 7.2. Register Tokens

In this section, we discuss the detail implementation of register tokens. Given a partially masked sequence  $X_t$  of length  $L$ , which can be partitioned into two subsets  $X^A, X^B$ , where  $A$  consists of clean token positions and  $B$  consists of masked positions. Let  $K = \{1, 2, \dots, L\}$  be the set of all token positions, we have that  $A \cup B = K$  and  $A \cap B = \emptyset$ . In the standard parameterization, we need to pass in  $L = |A| + |B|$  tokens, among which  $|B|$  are masked tokens, to the model, even if we are only interested in obtaining the prediction at a subset of masked position  $C \subset B$  at the current diffusion step.

The sparse parameterization introduces an extra set of  $m$  register tokens  $R = [R^1 \dots R^m]$ . Concretely, these are achieved by adding special tokens “[reg]” that is similar to mask token “[M]” to the vocabulary. All  $m$  register tokens are represented with the same special token “[reg]” at the tokenization level, but their positional ids are  $L + 1, L + 2, \dots, L + m$  respectively, leading to different rope embeddings and different behavior in the attention process. In this setup, the total token count is  $|A| + |C| + m$ . When  $|C| \ll |B|$ , we can achieve considerable speedup from reduced sequence length.

We visualize this design in Fig. 7. Sparse-LaViDa allows us to flexibly truncate masked tokens depending on which token prediction we want to obtain. When,  $C = B$ , Sparse-LaViDa reduces to the standard MDM parameterization. Hence, Sparse-LaViDa is a generalization to the standard MDM.

For simplicity, we use a simple partition  $A, B$  to elaborate the design of register tokens and sparse representation, as opposed to more complex partition  $C_1 \dots C_{k-1}$  that depends on sampling steps, which are used in Sec. 3.2 of the main text and the following Sec. 7.3 of the appendix.

## 7.3. Step-Causal Attention Masks

In this section, we provide a detailed account of step-causal attention mask, with particular focus on how the design of step-causal attention mask aligns with the inference process with KV caching.

**Inference Time.** Suppose we have  $S$  prompt tokens and generate a clean response with  $L$  tokens through  $k$  diffusion steps. We can naturally obtain a  $k$ -partition of the  $L$  response tokens  $C_1 \dots C_k$  depending on when they are unmasked during the  $k$  diffusion steps. We also define  $C_0$  as the set of prompt tokens, which are never masked.

Fig. 8a illustrates an example, which consists of  $S = 3$  prompt tokens  $P_0 \dots P_2$  and  $L = 6$  response tokens  $X_0 \dots X_5$ . We also assume we have  $k = 4$  diffusion steps and there is only one register token  $R$ . As illustrated in the figure, sampling process #1 induces the partition  $C_0 = \{P_0, P_1, P_2\}$ ,  $C_1 = \{X_1, X_3\}$ ,  $C_2 = \{X_0\}$ ,  $C_3 = \{X_2, X_5\}$ ,  $C_4 = \{X_4\}$ , where tokens in  $C_1, C_2, C_3, C_4$  are unmasked at the first, second, third, and fourth diffusion steps respectively. After a token is generated at  $i$ th step, it is passed back to the model in  $(i + 1)$ th step and added to the cache after the model forward call. This is also illustrated in the figure (black dashed box). For example, tokens in  $C_1 = \{X_1, X_3\}$  is added to the KV cache after step 2.

At the  $i$ th diffusion step, the KV cache consist of all tokens in  $C_j$  where  $j < i - 1$ . The input of the model consist of the previously generated tokens in  $C_{i-1}$ , the set of masked tokens to be decoded at the current step  $C_i$ , and the register token  $R$ .

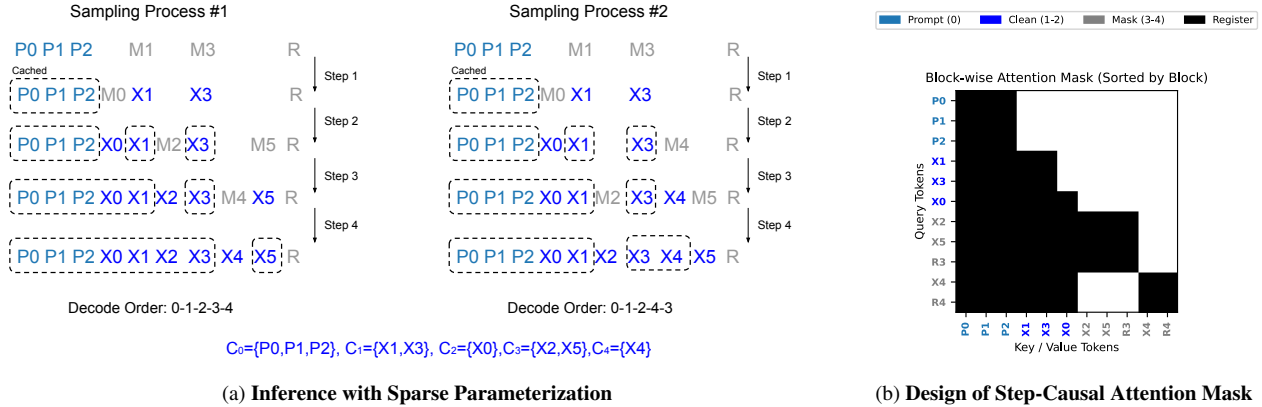

Figure 8. **Connection between the Diffusion Sampling Process and the Step-Causal-Attention-Mask.** (Left) Given prompt tokens  $P_0 \dots P_2$  and response tokens  $X_0 \dots X_5$ , we partition the response tokens with  $C_1 \dots C_4$  and assign prompt tokens to  $C_0$ . Both 0-1-2-3-4 and 0-1-2-4-3 are viable sampling order of tokens in a 4-step diffusion process. We use M to represent mask tokens and R represent registers. (Right), for the two sampling process, we can simulate step 3 of both processes simultaneously via a special attention mask.

Since  $C_{i-1}$  are to be added to the KV cache, we prevent the queries of  $C_{i-1}$  to interact with keys and values of  $C_i$  and  $R$  as discussed in Sec. 3.3.

Taking step 3 as an example, the KV cache consists of tokens in  $C_0, C_1$  (boxed), which are  $P_0, P_1, P_2, X_1, X_3$ . The input consists of tokens in  $C_2$ , which is just  $X_0$ , and masked tokens in  $C_3$ , denoted by  $M_2, M_5$ , as well as a register token  $R$ . In this step,  $X_0$  from  $C_2$  cannot attention to  $M_2, M_5, R$ , (color-coded as gray), while  $M_2, M_5, R$  can attend to all other tokens.

Note that while the partition  $C_0, C_1 \dots C_4$  derives from the sampling process #1, its decoding order 0-1-2-3-4 does not uniquely leads to this partition. For instance, sampling process #2 with decoding order 0-1-2-4-3 also has the same partition (Fig. 8a, Right). Moreover, we note that at step 3 of sampling process #2, the KV cache is exactly the same as sampling process #1. Among the input tokens,  $X_0$  from  $C_2$  has exactly the same behavior as sampling process #1 because of the attention mask. The only differences lies in the input of masked tokens. In sampling process #1, we have  $M_2, M_5$  since at this step we want to unmask  $C_3$ . In sampling process #2, we have  $M_4$  since at this step we want to unmask  $C_4$ . This observation gives us the opportunity to parallelize the training by simulate sampling process #1 and sampling process #2 simultaneously through a special attention mask.

**Training time.** We can merge sampling process #1 and sampling process #2 by constructing the sequence  $P_0, P_1, P_2, X_1, X_3, X_0, X_2, X_5, R_3, X_5, R_4$ , where  $R_3, R_4$  are duplicates of the same register token  $R$ . We assign a step-causal attention mask for tokens  $P_0, P_1, P_2, X_1, X_3, X_0$ , as they have exactly the same attention pattern in both sampling steps. To accommodate the difference of masked token inputs where sampling process #1 has  $M_2, M_5, R$  and sampling process #2 has  $M_4, R$  we concatenate the sequences to form  $M_2, M_5, R_3, M_4, R_4$  and design a block-diagonal attention mask that ensures input tokens from one sampling process cannot attend to tokens from another same sampling process (bottom-right section of Fig. 8b). We denote two copies of  $R$  as  $R_3, R_4$  since  $M_2, M_5$  comes from partition  $C_3$  and  $M_4$  comes from partition  $C_4$ . This design of attention mask is illustrated in Fig. 8b.

The training-time attention mask is formally defined in Algorithm 1. In the above example, to simulate sampling process 0-1-2-3-4 and 0-1-2-4-3, we set the number of clean blocks  $M = 2$  (i.e.  $C_0, C_1$ ) and the number of masked blocks  $N = 2$  (i.e.  $C_3, C_4$ ). We assign the block number to tokens based on which of the partition  $C_0 \dots C_4$  they belong to. The duplicated register tokens  $R_3, R_4$  are assigned with block numbers 3 and 4 respectively.

---

**Algorithm 1** Step-Causal Attention Mask Construction

---

**Require:** Block assignments  $A \in \mathbb{Z}^{L+S}$ , number of clean blocks  $M$ , number of masked blocks  $N$

```
1: Initialize mask  $\in \{0, 1\}^{(L+S) \times (L+S)}$  to zeros
2: for  $q_i = 0$  to  $L + S - 1$  do
3:    $q_b \leftarrow A[q_i]$  ▷ Block index of query token
4:   for  $k_j = 0$  to  $L + S - 1$  do
5:      $k_b \leftarrow A[k_j]$  ▷ Block index of key token
6:     if  $q_b = 0$  then ▷ Prompt token: full attention to prompt
7:       if  $k_b \leq 0$  then
8:          $\text{mask}[q_i, k_j] \leftarrow 1$ 
9:       end if
10:    else if  $1 \leq q_b \leq M$  then ▷ Clean token: attend up to its block
11:      if  $k_b \leq q_b$  then
12:         $\text{mask}[q_i, k_j] \leftarrow 1$ 
13:      end if
14:    else if  $M + 1 \leq q_b \leq M + N$  then ▷ Masked tokens: attend to prompt/clean tokens, or those in the same block
15:      if  $(k_b \leq M) \vee (k_b = q_b)$  then
16:         $\text{mask}[q_i, k_j] \leftarrow 1$ 
17:      end if
18:    end if
19:  end for
20: end for
21: return mask
```

---

## 8. Additional Experiment Details and Results

### 8.1. Data pipeline

Our training dataset consist of the following tasks.

- *A: Text-to-Image Pairs.* We source data from LAION-2B [53] and COYO-700M [6]. We additionally include BLIP3o-60k [10], and ShareGPT4o-Image [9]. Each dataset is heavily filtered to remove NSFW prompts, low CLIP scores [49], low aesthetic scores [52], and low-resolution images following LaViDa-O’s pipeline. We include all data from BLIP3o-60k and ShareGPT4o-Image, and select highest-quality samples from LAION and COYO based on CLIP scores and aesthetic scores. The final data mix consist of 20M images. Unlike LaViDa-O, we did not include SA-1B [25], JourneyDB [56] because of quality issues. Specifically, human faces in SA-1B are blurred, while JourneyDB images have many artifacts even after heavy filtering.
- *B: Image-level Understanding Data.* We include MAmmoth-VL [18], and VisualWebInstruct [22].
- *C: Region-level Understanding Data.* We include Grand [50] and RefCOCO [23].
- *D: Image Editing Data.* We include ShareGPT4o-Image [9], GPT-Edit-1.5M [59], and the image editing subset of UniWorld-V1 [20].

### 8.2. Training Setup

We perform SFT training on the LaViDa-O weights using our proposed sparse-parameterization and step-causal attention mask. The hyper-parameters largely followed the SFT stage of LaViDa-O. We document the details of training setup and relevant hyperparameters in Tab. 9. The main experiments is conducted with 64 A100 GPUs across 8 nodes. The training takes 5 days in total, which is 15% of the LaViDa-O’s training budget (34.2 days from scratch).

### 8.3. Additional Results on Object Grounding

As shown in Fig. 6, one of the advantages of Sparse-LaViDa is that it does not employ a block-causal attention mask like block-diffusion, making it capable of tasks that requires bi-directional context such as inpainting, object grounding through infilling, and constrained text generation just like vanilla MDM.

We report quantitative results on object grounding tasks in Table 10. Overall, Sparse-LaViDa achieves comparable performance as the LaViDa-O baseline. Since all coordinates are generated in a single step, the two methods have identical

Table 9. **Training configurations of Sparse-LaViDa.** We report the relevant hyperparameters for training, including the learning rate, number of training steps, optimizer setup, image resolution for understanding and generation tasks.

| <b>SFT</b>           |                                 |
|----------------------|---------------------------------|
| Learning Rate        | $2 \times 10^{-5}$              |
| Steps                | 100k                            |
| $\beta_1$            | 0.99                            |
| $\beta_2$            | 0.999                           |
| optimizer            | AdamW                           |
| Loaded Parameters    | 10.4B                           |
| Trainable Parameters | 10.4B                           |
| Und. resolution      | $384 \times \{(1, 3), (2, 2)\}$ |
| Gen. resolution      | 1024                            |

inference speed because Sparse-LaViDa cannot benefit from token truncation in this setup.

Table 10. **Precision@0.5 on RefCOCO, RefCOCO+, and RefCOCOg REC tasks.**

| Model              | RefCOCO |       |       | RefCOCO+ |       |       | RefCOCOg |      |
|--------------------|---------|-------|-------|----------|-------|-------|----------|------|
|                    | val     | testA | testB | val      | testA | testB | val      | test |
| SegLLM-7B[58]      | 90.0    | 92.1  | 86.2  | 82.2     | 85.5  | 76.1  | 83.9     | 85.9 |
| Qwen2.5-VL-7B [3]  | 90.0    | 92.5  | 85.4  | 84.2     | 89.1  | 76.9  | 87.2     | 87.2 |
| GroundingDINO [35] | 90.6    | 93.2  | 88.2  | 88.2     | 89.0  | 75.9  | 86.1     | 87.0 |
| InternVL3-8B [77]  | 92.5    | 94.6  | 88.0  | 88.2     | 92.5  | 81.8  | 89.6     | 90.0 |
| LaViDa-O           | 91.9    | 94.6  | 88.4  | 87.4     | 91.7  | 82.2  | 89.5     | 89.8 |
| Sparse-LaViDa      | 92.3    | 94.9  | 89.1  | 87.4     | 92.5  | 81.8  | 89.6     | 89.9 |

#### 8.4. Additional Results with Larger Batch Size

In Table 11, we report results at a larger batch size for T2I tasks. Results show that LaViDa-O consistently outperforms baselines at varying batch sizes.

| Bs. | LaViDa-O $\uparrow$ | Sparse-LaViDa $\uparrow$ |
|-----|---------------------|--------------------------|
| 1   | 2.82                | 5.52                     |
| 2   | 3.85                | 7.26                     |
| 4   | 4.24                | 8.65                     |

Table 11. **Throughput Analysis. We report images/min. (Higher is better)**

#### 8.5. Additional Qualitative Comparisons

In Figure 9, we provide side-by-side qualitative comparisons of Sparse-LaViDa and the LaViDa-O baseline on text-to-image generation and image editing tasks. As shown in the figure, Sparse-LaViDa achieves comparable generation quality while offering a speedup of  $1.95\times$  on text-to-image generation and a speedup of  $2.83\times$  on image editing.

### 9. Limitations

Despite the promising results of Sparse-LaViDa, it has several limitations. First, the speedup only benefits long sequence generation such as text-to-image generation, image-editing, or visual math problem-solving with long reasoning chains. It does not improve the speed of short QA tasks or object grounding tasks, where the number of output tokens are very small.

## Text-to-Image Generation

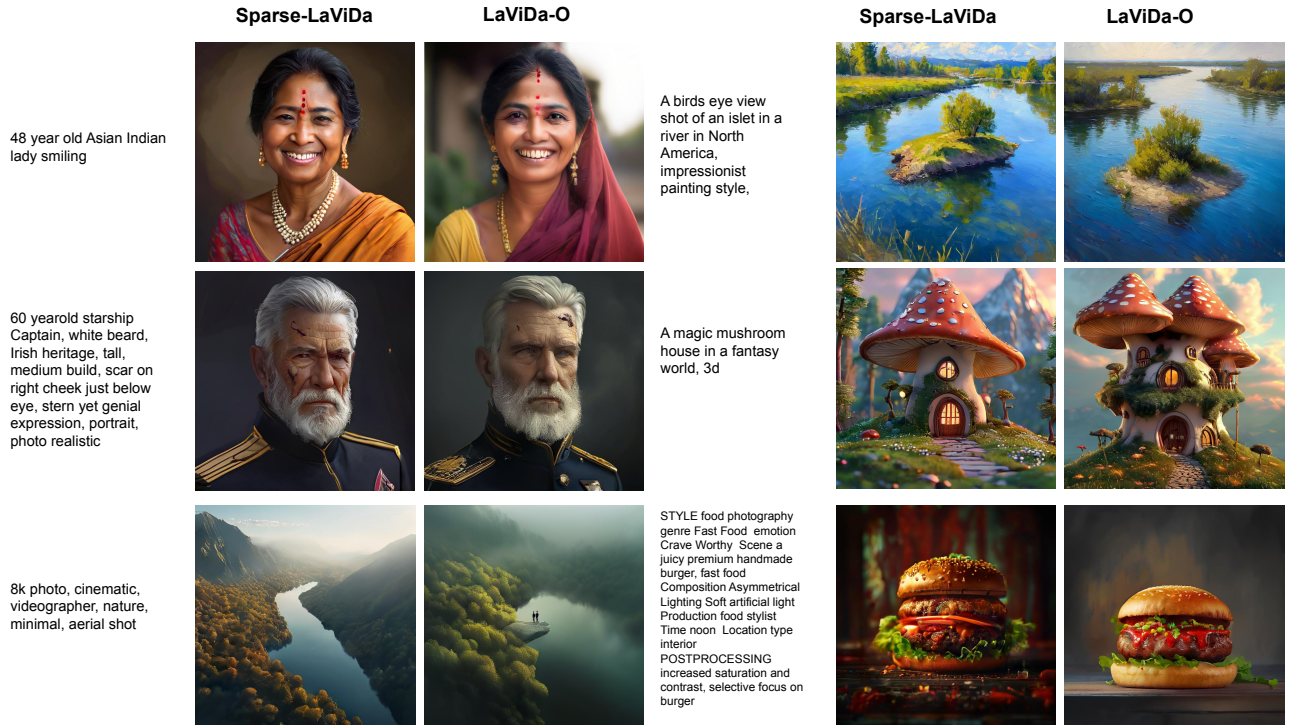

## Image Editing

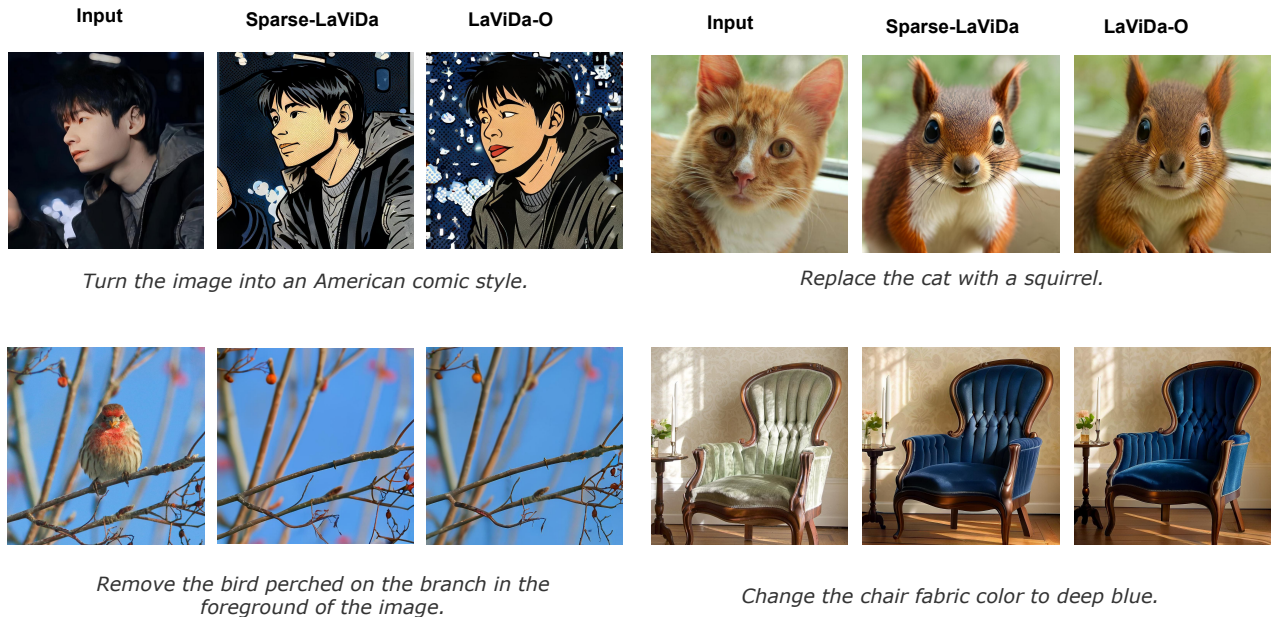

Figure 9. **Qualitative Comparisons of Sparse-LaViDa and LaViDa-O baseline.** We show qualitative results of text-to-image generation and image editing results of Sparse-LaViDa and LaViDa-O baseline. Sparse-LaViDa achieves a speedup of  $1.95\times$  on text-to-image generation and a speedup of  $2.83\times$  on image editing, while maintaining comparable visual quality

We emphasize that Sparse-LaViDa will benefit any tasks involving image generation, since an image is represented by 4096 VQ tokens.

Second, our model inherits many limitations from the base model LaViDa-O, such as hallucination in responses. Further, we observe the same pixel shift issue discovered by LaViDa-O, where image editing results may have subtle changes in un-edited regions. We hope this issue will be addressed by future foundational models.

Lastly, while we have demonstrated Sparse-LaViDa is an efficient post-training technique, in principle it should be general to all stages including pretraining. It would be interesting for researchers with more compute resources to apply this to different stages of training.
